# Supplementary material for: The Presence of a Parasite in the Head Tissues of a Threatened Fish (Bidyanus bidyanus, Terapontidae) from South-Eastern Australia
Source: MDPI journal article supplement (doi:10.3390/pathogens12111296), 2023-10-30
Supplement: s1 [file s1]

**Supplementary Table S1.** Sequences used in sequence analysis of the mesocercaria collected from silver perch in this study. *Uvulifer* sp. was used as the outgroup. DS = Developmental stage: A, Adult; MC, Metacercaria. NA = Not available.

| ID | Species Name                          | Accession Number | DS | Host species                    | Locality                     | Reference                            |
|----|---------------------------------------|------------------|----|---------------------------------|------------------------------|--------------------------------------|
| 1  | Strigeidae sp.                        | TBC              | MC | <i>Bidyanus bidyanus</i>        | Wakool River, NSW, Australia | This study                           |
| 2  | <i>Cardiocephaloides medioconiger</i> | MH521247         | A  | <i>Thalasseus maximus</i>       | Florida, USA                 | Locke <i>et al.</i> (2018)           |
| 3  | <i>Cardiocephaloides medioconiger</i> | JX977842         | A  | <i>Larus</i> sp.                | Campeche, Mexico             | Hernández-Mena <i>et al.</i> (2014)  |
| 4  | <i>Cardiocephaloides medioconiger</i> | MN820664         | A  | <i>Thalasseus maximus</i>       | Mississippi, USA             | Achatz <i>et al.</i> (2020)          |
| 5  | <i>Cardiocephaloides medioconiger</i> | JX977843         | A  | <i>Larus</i> sp.                | Campeche, Mexico             | Hernández-Mena <i>et al.</i> (2014)  |
| 6  | <i>Cardiocephaloides</i> sp.          | JX977844         | A  | <i>Larus occidentalis</i>       | Baja California Sur, Mexico  | Hernández-Mena <i>et al.</i> (2014)  |
| 7  | <i>Cardiocephaloides longicollis</i>  | MN820663         | A  | <i>Larus argentatus</i>         | Kyiv Oblast, Ukraine         | Achatz <i>et al.</i> (2020)          |
| 8  | <i>Cardiocephaloides physalis</i>     | MN820665         | A  | <i>Spheniscus magellanicus</i>  | Magallanes Region, Chile     | Achatz <i>et al.</i> (2020)          |
| 9  | <i>Cotylurus marcogliesei</i>         | MH521248         | A  | <i>Lophodytes cucullatus</i>    | Quebec, Canada               | Locke <i>et al.</i> (2018)           |
| 10 | <i>Cotylurus</i> sp.                  | MN179272         | C  | <i>Biomphalaria straminea</i>   | Minas Gerais, Brazil         | López-Hernández <i>et al.</i> (2019) |
| 11 | <i>Cotylurus</i> sp.                  | MN179271         | C  | <i>Biomphalaria straminea</i>   | Minas Gerais, Brazil         | López-Hernández <i>et al.</i> (2019) |
| 12 | <i>Cotylurus gallinulae</i>           | JX977841         | A  | <i>Aythya affinis</i>           | Sonora, Mexico               | Hernández-Mena <i>et al.</i> (2014)  |
| 13 | <i>Apharyngostrigea cornu</i>         | JX977840         | A  | <i>Nyctanassa violacea</i>      | Veracruz, Mexico             | Hernández-Mena <i>et al.</i> (2014)  |
| 14 | <i>Apharyngostrigea cornu</i>         | JX977839         | A  | <i>Nyctycorax nyctycorax</i>    | Sinaloa, Mexico              | Hernández-Mena <i>et al.</i> (2014)  |
| 15 | <i>Apharyngostrigea cornu</i>         | JX977838         | A  | <i>Butoroides virescens</i>     | Veracruz, Mexico             | Hernández-Mena <i>et al.</i> (2014)  |
| 16 | <i>Apharyngostrigea cornu</i>         | JX977837         | A  | <i>Ardea alba</i>               | Veracruz, Mexico             | Hernández-Mena <i>et al.</i> (2014)  |
| 17 | <i>Apharyngostrigea simplex</i>       | MK510081         | A  | <i>Egretta thula</i>            | Dero, Argentina              | Unpublished                          |
| 18 | <i>Apharyngostrigea</i> sp.           | MN179273         | C  | <i>Biomphalaria straminea</i>   | Minas Gerais, Brazil         | López-Hernández <i>et al.</i> (2019) |
| 19 | <i>Parastrigea robusta</i>            | MF537205         | MC | <i>Lissotriton vulgaris</i>     | Koblenz, Germany             | Sinsch <i>et al.</i> (2019)          |
| 20 | <i>Parastrigea robusta</i>            | MF537208         | MC | <i>Lissotriton vulgaris</i>     | Koblenz, Germany             | Sinsch <i>et al.</i> (2019)          |
| 21 | <i>Parastrigea robusta</i>            | MF537207         | MC | <i>Lissotriton vulgaris</i>     | Koblenz, Germany             | Sinsch <i>et al.</i> (2019)          |
| 22 | <i>Parastrigea robusta</i>            | MF537206         | MC | <i>Lissotriton vulgaris</i>     | Koblenz, Germany             | Sinsch <i>et al.</i> (2019)          |
| 23 | <i>Parastrigea diovadena</i>          | JX977789         | A  | <i>Eudocimus albus</i>          | Sinaloa, Mexico              | Hernández-Mena <i>et al.</i> (2014)  |
| 24 | <i>Parastrigea cincta</i>             | JX977817         | A  | <i>Eudocimus albus</i>          | Sinaloa, Mexico              | Hernández-Mena <i>et al.</i> (2014)  |
| 25 | <i>Parastrigea plataleae</i>          | JX977821         | A  | <i>Platalea ajaja</i>           | Sinaloa, Mexico              | Hernández-Mena <i>et al.</i> (2014)  |
| 26 | <i>Apatemon</i> sp.                   | MT446442         | MC | <i>Hypseleotris klunzingeri</i> | Narrandera, NSW, Australia   | Shamsi <i>et al.</i> (2021)          |
| 27 | <i>Apatemon</i> sp.                   | KP959313         | MC | <i>Percottus glenii</i>         | Amur River, Russia           | Unpublished                          |
| 28 | <i>Australapatemon burti</i>          | JX977788         | A  | <i>Oxyura jamaicensis</i>       | Durango, Mexico              | Hernández-Mena <i>et al.</i> (2014)  |
| 29 | <i>Australapatemon burti</i>          | JX977785         | A  | <i>Anas americana</i>           | Baja California Sur, Mexico  | Hernández-Mena <i>et al.</i> (2014)  |
| 30 | <i>Australapatemon burti</i>          | JX977786         | A  | <i>Anas cyanoptera</i>          | Estado de México, Mexico     | Hernández-Mena <i>et al.</i> (2014)  |
| 31 | <i>Australapatemon burti</i>          | KY207626         | C  | <i>Helisoma trivolvis</i>       | Alberta, Canada              | Gordy <i>et al.</i> (2017)           |
| 32 | <i>Australapatemon burti</i>          | KY570947         | C  | <i>Planorbidae</i> sp.          | California, USA              | Gordy <i>et al.</i> (2017)           |
| 33 | <i>Australapatemon burti</i>          | JX977787         | A  | <i>Anas diazi</i>               | Estado de México, Mexico     | Hernández-Mena <i>et al.</i> (2014)  |
| 34 | <i>Australapatemon</i> sp.            | KY570946         | A  | <i>Oxyuris jamaicensis</i>      | Lake Manitoba, Canada        | Gordy <i>et al.</i> (2017)           |
| 35 | <i>Australapatemon mclaughlini</i>    | KY207628         | C  | <i>Physella gyrina</i>          | Alberta, Canada              | Gordy <i>et al.</i> (2017)           |

**Supplementary Table S2.** Genetic distance of the ITS sequences used in this study. Please refer to Table S1 for the ID of the sequences.

| ID | 1    | 2    | 3    | 4    | 5    | 6    | 7    | 8    | 9    | 10   | 11   | 12   | 13   | 14   | 15   | 16   | 17   | 18   | 19   | 20   | 21   | 22   | 23   | 24   | 25   | 26   | 27   | 28   | 29   | 30   | 31  | 32  | 33  | 34  | 35  |     |
|----|------|------|------|------|------|------|------|------|------|------|------|------|------|------|------|------|------|------|------|------|------|------|------|------|------|------|------|------|------|------|-----|-----|-----|-----|-----|-----|
| 1  |      | 51   | 51   | 50   | 51   | 50   | 43   | 41   | 131  | 135  | 135  | 137  | 137  | 137  | 137  | 137  | 147  | 147  | 142  | 142  | 142  | 142  | 144  | 142  | 145  | 126  | 123  | 135  | 132  | 132  | 132 | 132 | 131 | 131 | 135 | 132 |
| 2  | 0.06 |      | 0    | 1    | 2    | 14   | 24   | 26   | 133  | 133  | 133  | 139  | 135  | 135  | 135  | 135  | 144  | 144  | 142  | 142  | 142  | 142  | 142  | 140  | 141  | 122  | 119  | 130  | 127  | 127  | 127 | 126 | 126 | 130 | 127 |     |
| 3  | 0.06 | 0.00 |      | 1    | 2    | 14   | 24   | 26   | 133  | 133  | 133  | 139  | 135  | 135  | 135  | 135  | 144  | 144  | 142  | 142  | 142  | 142  | 142  | 140  | 141  | 122  | 119  | 130  | 127  | 127  | 127 | 126 | 126 | 130 | 127 |     |
| 4  | 0.05 | 0.00 | 0.00 |      | 1    | 13   | 23   | 25   | 132  | 132  | 132  | 138  | 134  | 134  | 134  | 134  | 143  | 143  | 141  | 141  | 141  | 141  | 141  | 139  | 140  | 121  | 118  | 129  | 126  | 126  | 126 | 125 | 125 | 129 | 126 |     |
| 5  | 0.06 | 0.00 | 0.00 | 0.00 |      | 14   | 24   | 26   | 133  | 133  | 133  | 139  | 133  | 133  | 133  | 133  | 142  | 142  | 142  | 142  | 142  | 142  | 142  | 140  | 141  | 122  | 119  | 128  | 125  | 125  | 125 | 124 | 124 | 128 | 125 |     |
| 6  | 0.05 | 0.02 | 0.02 | 0.01 | 0.02 |      | 24   | 25   | 128  | 126  | 126  | 133  | 132  | 132  | 132  | 132  | 141  | 141  | 141  | 141  | 141  | 141  | 142  | 140  | 143  | 122  | 119  | 130  | 127  | 127  | 127 | 126 | 126 | 130 | 127 |     |
| 7  | 0.05 | 0.03 | 0.03 | 0.02 | 0.03 | 0.03 |      | 20   | 127  | 126  | 126  | 131  | 135  | 135  | 135  | 135  | 146  | 146  | 143  | 143  | 143  | 143  | 141  | 139  | 142  | 123  | 120  | 134  | 131  | 131  | 131 | 130 | 130 | 134 | 131 |     |
| 8  | 0.04 | 0.03 | 0.03 | 0.03 | 0.03 | 0.03 | 0.02 |      | 121  | 122  | 122  | 126  | 131  | 131  | 131  | 131  | 146  | 146  | 138  | 138  | 138  | 138  | 140  | 140  | 143  | 119  | 118  | 132  | 129  | 129  | 129 | 128 | 128 | 132 | 129 |     |
| 9  | 0.14 | 0.14 | 0.14 | 0.14 | 0.14 | 0.14 | 0.14 | 0.13 |      | 22   | 22   | 26   | 138  | 138  | 138  | 138  | 153  | 153  | 140  | 140  | 140  | 140  | 149  | 147  | 150  | 131  | 132  | 141  | 140  | 140  | 140 | 141 | 139 | 141 | 140 |     |
| 10 | 0.15 | 0.14 | 0.14 | 0.14 | 0.14 | 0.14 | 0.14 | 0.13 | 0.02 |      | 0    | 26   | 139  | 139  | 139  | 139  | 153  | 153  | 143  | 143  | 143  | 143  | 143  | 155  | 153  | 156  | 134  | 135  | 141  | 142  | 142 | 140 | 141 | 139 | 141 | 142 |
| 11 | 0.15 | 0.14 | 0.14 | 0.14 | 0.14 | 0.14 | 0.14 | 0.13 | 0.02 | 0.00 |      | 26   | 139  | 139  | 139  | 139  | 153  | 153  | 143  | 143  | 143  | 143  | 143  | 155  | 153  | 156  | 134  | 135  | 141  | 142  | 142 | 140 | 141 | 139 | 141 | 142 |
| 12 | 0.15 | 0.15 | 0.15 | 0.15 | 0.15 | 0.14 | 0.14 | 0.14 | 0.03 | 0.03 | 0.03 |      | 147  | 147  | 147  | 147  | 160  | 160  | 148  | 148  | 148  | 148  | 161  | 159  | 160  | 134  | 135  | 148  | 145  | 145  | 147 | 148 | 146 | 148 | 145 |     |
| 13 | 0.15 | 0.15 | 0.15 | 0.14 | 0.14 | 0.14 | 0.15 | 0.14 | 0.15 | 0.15 | 0.15 | 0.16 |      | 1    | 1    | 1    | 26   | 26   | 52   | 52   | 52   | 52   | 55   | 55   | 56   | 51   | 55   | 68   | 61   | 61   | 61  | 60  | 62  | 68  | 61  |     |
| 14 | 0.15 | 0.15 | 0.15 | 0.14 | 0.14 | 0.14 | 0.15 | 0.14 | 0.15 | 0.15 | 0.15 | 0.16 | 0.00 |      | 0    | 0    | 25   | 25   | 51   | 51   | 51   | 51   | 54   | 54   | 55   | 52   | 56   | 69   | 62   | 62   | 62  | 61  | 63  | 69  | 62  |     |
| 15 | 0.15 | 0.15 | 0.15 | 0.14 | 0.14 | 0.14 | 0.15 | 0.14 | 0.15 | 0.15 | 0.15 | 0.16 | 0.00 | 0.00 |      | 0    | 25   | 25   | 51   | 51   | 51   | 51   | 54   | 54   | 55   | 52   | 56   | 69   | 62   | 62   | 62  | 61  | 63  | 69  | 62  |     |
| 16 | 0.15 | 0.15 | 0.15 | 0.14 | 0.14 | 0.14 | 0.15 | 0.14 | 0.15 | 0.15 | 0.15 | 0.16 | 0.00 | 0.00 | 0.00 |      | 25   | 25   | 51   | 51   | 51   | 51   | 54   | 54   | 55   | 52   | 56   | 69   | 62   | 62   | 62  | 61  | 63  | 69  | 62  |     |
| 17 | 0.16 | 0.16 | 0.16 | 0.15 | 0.15 | 0.15 | 0.16 | 0.16 | 0.17 | 0.17 | 0.17 | 0.17 | 0.03 | 0.03 | 0.03 | 0.03 |      | 0    | 64   | 64   | 64   | 64   | 62   | 60   | 61   | 69   | 69   | 74   | 69   | 69   | 69  | 68  | 70  | 74  | 69  |     |
| 18 | 0.16 | 0.16 | 0.16 | 0.15 | 0.15 | 0.15 | 0.16 | 0.16 | 0.17 | 0.17 | 0.17 | 0.17 | 0.03 | 0.03 | 0.03 | 0.03 | 0.00 |      | 64   | 64   | 64   | 64   | 62   | 60   | 61   | 69   | 69   | 74   | 69   | 69   | 69  | 68  | 70  | 74  | 69  |     |
| 19 | 0.15 | 0.15 | 0.15 | 0.15 | 0.15 | 0.15 | 0.15 | 0.15 | 0.15 | 0.15 | 0.15 | 0.16 | 0.06 | 0.06 | 0.06 | 0.06 | 0.07 | 0.07 |      | 0    | 0    | 0    | 60   | 59   | 59   | 63   | 64   | 83   | 78   | 78   | 78  | 77  | 77  | 83  | 78  |     |
| 20 | 0.15 | 0.15 | 0.15 | 0.15 | 0.15 | 0.15 | 0.15 | 0.15 | 0.15 | 0.15 | 0.15 | 0.16 | 0.06 | 0.06 | 0.06 | 0.06 | 0.07 | 0.07 | 0.00 |      | 0    | 0    | 60   | 59   | 59   | 63   | 64   | 83   | 78   | 78   | 78  | 77  | 77  | 83  | 78  |     |
| 21 | 0.15 | 0.15 | 0.15 | 0.15 | 0.15 | 0.15 | 0.15 | 0.15 | 0.15 | 0.15 | 0.15 | 0.16 | 0.06 | 0.06 | 0.06 | 0.06 | 0.07 | 0.07 | 0.00 | 0.00 |      | 0    | 60   | 59   | 59   | 63   | 64   | 83   | 78   | 78   | 78  | 77  | 77  | 83  | 78  |     |
| 22 | 0.15 | 0.15 | 0.15 | 0.15 | 0.15 | 0.15 | 0.15 | 0.15 | 0.15 | 0.15 | 0.15 | 0.16 | 0.06 | 0.06 | 0.06 | 0.06 | 0.07 | 0.07 | 0.00 | 0.00 | 0.00 |      | 60   | 59   | 59   | 63   | 64   | 83   | 78   | 78   | 78  | 77  | 77  | 83  | 78  |     |
| 23 | 0.16 | 0.15 | 0.15 | 0.15 | 0.15 | 0.15 | 0.15 | 0.15 | 0.16 | 0.17 | 0.17 | 0.17 | 0.06 | 0.06 | 0.06 | 0.06 | 0.07 | 0.07 | 0.06 | 0.06 | 0.06 | 0.06 |      | 4    | 5    | 70   | 70   | 83   | 79   | 79   | 77  | 76  | 76  | 83  | 79  |     |
| 24 | 0.15 | 0.15 | 0.15 | 0.15 | 0.15 | 0.15 | 0.15 | 0.15 | 0.16 | 0.17 | 0.17 | 0.17 | 0.06 | 0.06 | 0.06 | 0.06 | 0.06 | 0.06 | 0.06 | 0.06 | 0.06 | 0.06 | 0.00 |      | 5    | 70   | 68   | 81   | 77   | 77   | 75  | 74  | 74  | 81  | 77  |     |
| 25 | 0.16 | 0.15 | 0.15 | 0.15 | 0.15 | 0.15 | 0.15 | 0.15 | 0.16 | 0.17 | 0.17 | 0.17 | 0.06 | 0.06 | 0.06 | 0.06 | 0.07 | 0.07 | 0.06 | 0.06 | 0.06 | 0.06 | 0.01 | 0.01 |      | 69   | 67   | 82   | 76   | 76   | 76  | 75  | 75  | 82  | 76  |     |
| 26 | 0.14 | 0.13 | 0.13 | 0.13 | 0.13 | 0.13 | 0.13 | 0.13 | 0.14 | 0.14 | 0.14 | 0.14 | 0.06 | 0.06 | 0.06 | 0.06 | 0.07 | 0.07 | 0.07 | 0.07 | 0.07 | 0.07 | 0.07 | 0.08 | 0.08 | 0.07 |      | 10   | 44   | 37   | 37  | 39  | 40  | 40  | 44  | 37  |
| 27 | 0.13 | 0.13 | 0.13 | 0.13 | 0.13 | 0.13 | 0.13 | 0.13 | 0.14 | 0.15 | 0.15 | 0.15 | 0.06 | 0.06 | 0.06 | 0.06 | 0.07 | 0.07 | 0.07 | 0.07 | 0.07 | 0.07 | 0.07 | 0.08 | 0.07 | 0.07 | 0.01 |      | 40   | 35   | 35  | 37  | 38  | 38  | 40  | 35  |
| 28 | 0.15 | 0.14 | 0.14 | 0.14 | 0.14 | 0.14 | 0.14 | 0.14 | 0.15 | 0.15 | 0.15 | 0.16 | 0.07 | 0.07 | 0.07 | 0.07 | 0.08 | 0.08 | 0.09 | 0.09 | 0.09 | 0.09 | 0.09 | 0.09 | 0.09 | 0.05 | 0.04 |      | 17   | 18   | 15  | 16  | 16  | 0   | 17  |     |
| 29 | 0.14 | 0.14 | 0.14 | 0.14 | 0.13 | 0.14 | 0.14 | 0.14 | 0.15 | 0.15 | 0.15 | 0.16 | 0.07 | 0.07 | 0.07 | 0.07 | 0.07 | 0.07 | 0.08 | 0.08 | 0.08 | 0.08 | 0.09 | 0.08 | 0.08 | 0.04 | 0.04 | 0.02 |      | 3    | 6   | 7   | 7   | 17  | 0   |     |
| 30 | 0.14 | 0.14 | 0.14 | 0.14 | 0.13 | 0.14 | 0.14 | 0.14 | 0.15 | 0.15 | 0.15 | 0.16 | 0.07 | 0.07 | 0.07 | 0.07 | 0.07 | 0.07 | 0.08 | 0.08 | 0.08 | 0.08 | 0.09 | 0.08 | 0.08 | 0.04 | 0.04 | 0.02 | 0.00 |      | 7   | 8   | 8   | 18  | 3   |     |
| 31 | 0.14 | 0.14 | 0.14 | 0.14 | 0.13 | 0.14 | 0.14 | 0.14 | 0.15 | 0.15 | 0.15 | 0.16 | 0.07 | 0.07 | 0.07 | 0.07 | 0.07 | 0.07 | 0.08 | 0.08 | 0.08 | 0.08 | 0.08 | 0.08 | 0.08 | 0.04 | 0.04 | 0.02 | 0.01 | 0.01 |     | 1   | 3   | 15  | 6   |     |

|    |      |      |      |      |      |      |      |      |      |      |      |      |      |      |      |      |      |      |      |      |      |      |      |      |      |      |      |      |      |      |      |      |      |      |    |
|----|------|------|------|------|------|------|------|------|------|------|------|------|------|------|------|------|------|------|------|------|------|------|------|------|------|------|------|------|------|------|------|------|------|------|----|
| 32 | 0.14 | 0.14 | 0.14 | 0.13 | 0.13 | 0.14 | 0.14 | 0.14 | 0.15 | 0.15 | 0.15 | 0.16 | 0.06 | 0.07 | 0.07 | 0.07 | 0.07 | 0.07 | 0.08 | 0.08 | 0.08 | 0.08 | 0.08 | 0.08 | 0.08 | 0.04 | 0.04 | 0.02 | 0.01 | 0.01 | 0.00 |      | 4    | 16   | 7  |
| 33 | 0.14 | 0.14 | 0.14 | 0.13 | 0.13 | 0.14 | 0.14 | 0.14 | 0.15 | 0.15 | 0.15 | 0.16 | 0.07 | 0.07 | 0.07 | 0.07 | 0.08 | 0.08 | 0.08 | 0.08 | 0.08 | 0.08 | 0.08 | 0.08 | 0.08 | 0.04 | 0.04 | 0.02 | 0.01 | 0.01 | 0.00 | 0.00 |      | 16   | 7  |
| 34 | 0.15 | 0.14 | 0.14 | 0.14 | 0.14 | 0.14 | 0.14 | 0.14 | 0.15 | 0.15 | 0.15 | 0.16 | 0.07 | 0.07 | 0.07 | 0.07 | 0.08 | 0.08 | 0.09 | 0.09 | 0.09 | 0.09 | 0.09 | 0.09 | 0.09 | 0.05 | 0.04 | 0.00 | 0.02 | 0.02 | 0.02 | 0.02 | 0.02 |      | 17 |
| 35 | 0.14 | 0.14 | 0.14 | 0.14 | 0.13 | 0.14 | 0.14 | 0.14 | 0.15 | 0.15 | 0.15 | 0.16 | 0.07 | 0.07 | 0.07 | 0.07 | 0.07 | 0.08 | 0.08 | 0.08 | 0.08 | 0.09 | 0.08 | 0.08 | 0.04 | 0.04 | 0.02 | 0.00 | 0.00 | 0.01 | 0.01 | 0.01 | 0.01 | 0.02 |    |
